# Supplementary material
Source: PubMed Central journal article supplement (PMC4790499)
Supplement: kane004896.wt1_default.pdf [file kane004896.wt1_default.pdf]

**Supplementary Table S1 Interaction tests**

| Outcome                 | Screening approach*screening method |         | Screening approach*intervention |      | Screening method*intervention |      |
|-------------------------|-------------------------------------|---------|---------------------------------|------|-------------------------------|------|
|                         | Test                                | p-value |                                 |      |                               |      |
| AUDIT Status – Month 6  | $\chi^2_1=0.07$                     | 0.79    | $\chi^2_2=2.55$                 | 0.28 | $\chi^2_2=1.06$               | 0.59 |
| AUDIT Status – Month 12 | $\chi^2_1=0.04$                     | 0.85    | $\chi^2_2=1.37$                 | 0.50 | $\chi^2_2=1.67$               | 0.43 |
| AUDIT score – Month 6   | F(1,42)=2.87                        | 0.10    | F(2,42)=0.16                    | 0.85 | F(2,42)=1.29                  | 0.29 |
| AUDIT score – Month 12  | F(1,42)=2.87                        | 0.10    | F(2,42)=0.77                    | 0.47 | F(2,42)=0.56                  | 0.58 |
| APQ – Month 6           | F(1,42)=1.27                        | 0.27    | F(2,43)=4.94                    | 0.01 | F(2,42)=1.64                  | 0.21 |
| APQ – Month 12          | F(1,42)=0.01                        | 0.91    | F(2,42)=0.53                    | 0.59 | F(2,42)=1.47                  | 0.24 |

APQ = Alcohol Problems Questionnaire

\*estimates from linear regression models adjusting for screening approach, screening tool, age, gender and baseline AUDIT score
